# Supplementary material
Source: PubMed Central journal article supplement (PMC2889798)
Supplement: mcq090_1.pdf [file mcq090_1.pdf]

## SUPPLEMENTARY DATA

Matrix of 51 morphological characters used in the phylogenetic analyses. –, Inapplicable character; ?, missing data; [ ], polymorphic character.

| Taxon                           | Character |   |   |   |   |   |   |   |   |    |      |    |    |    |    |    |      |    |      |    |
|---------------------------------|-----------|---|---|---|---|---|---|---|---|----|------|----|----|----|----|----|------|----|------|----|
|                                 | 1         | 2 | 3 | 4 | 5 | 6 | 7 | 8 | 9 | 10 | 11   | 12 | 13 | 14 | 15 | 16 | 17   | 18 | 19   | 20 |
| <i>Rupichloa acuminata</i>      | 5         | 1 | 0 | 0 | – | 0 | 1 | 0 | – | –  | 0    | 1  | –  | 0  | 0  | 1  | –    | –  | –    | –  |
| <i>Ixophorus unisetus</i>       | 4         | 0 | 0 | 0 | 0 | 0 | 1 | 0 | – | –  | 0    | 1  | –  | 0  | 0  | 2  | 0    | 0  | 2    | 0  |
| <i>Paspalidium geminatum</i>    | 3         | 2 | 0 | 1 | 0 | 0 | 1 | 0 | – | –  | 0    | 1  | –  | 0  | 0  | 2  | 0    | 0  | 0    | 0  |
| <i>Setaria palmifolia</i>       | 3         | 1 | 0 | 0 | 0 | 1 | 1 | 0 | – | –  | 0    | 1  | 0  | 0  | 0  | 2  | 0    | 0  | 2    | 0  |
| <i>Setaria parviflora</i>       | 3         | 2 | 0 | 0 | 1 | 0 | 0 | 1 | 1 | –  | 0    | 1  | 0  | 0  | 0  | 2  | 0    | 0  | 2    | 0  |
| <i>Setaria sphacelata</i>       | 3         | 2 | 0 | 0 | 1 | 0 | 0 | 1 | 1 | –  | 0    | 1  | 0  | 0  | 0  | 1  | 0    | 0  | 2    | 1  |
| <i>Stenotaphrum secundatum</i>  | 3         | 1 | 0 | 0 | 0 | 0 | 0 | 2 | – | –  | 1    | 1  | –  | 0  | –  | –  | 0    | 0  | 2    | 0  |
| <i>Odontelytrum abyssinicum</i> | ?         | 0 | 0 | 0 | 1 | 0 | 0 | 2 | 0 | 0  | 1    | 0  | 0  | 0  | 1  | –  | –    | 0  | 2    | 0  |
| <i>Cenchrus brownii</i>         | [34]      | 1 | 0 | 0 | 1 | 0 | 0 | 2 | 0 | 1  | 1    | 0  | 0  | 0  | 1  | –  | –    | 1  | [12] | 1  |
| <i>Cenchrus ciliaris</i>        | 3         | 2 | 0 | 0 | 1 | 0 | 0 | 0 | 0 | 1  | 1    | 0  | 0  | 0  | 1  | –  | 1    | 0  | 1    | 1  |
| <i>Cenchrus echinatus</i>       | 4         | 1 | 0 | 0 | 1 | 0 | 0 | 0 | 0 | 1  | 1    | 0  | 0  | 0  | 1  | –  | –    | 1  | 1    | 1  |
| <i>Cenchrus incertus</i>        | 4         | 1 | 0 | 0 | 1 | 0 | 0 | 2 | 0 | 0  | 1    | 0  | 0  | 0  | 1  | –  | –    | 1  | 1    | 1  |
| <i>Cenchrus myosuroides</i>     | [36]      | 2 | 0 | 0 | 1 | 0 | 0 | 0 | 1 | –  | 1    | 0  | 1  | 0  | –  | –  | –    | 1  | 2    | 1  |
| <i>Cenchrus pilosus</i>         | 4         | 1 | 0 | 0 | 1 | 0 | 0 | 0 | 0 | 1  | 1    | 0  | 0  | 0  | 1  | –  | 1    | 0  | 1    | 1  |
| <i>Cenchrus setigerus</i>       | [34]      | 2 | 0 | 0 | 1 | 0 | 0 | 0 | 0 | 2  | 1    | 0  | 0  | 0  | 1  | –  | –    | 0  | 1    | 1  |
| <i>Pennisetum alopecuroides</i> | 3         | 1 | 0 | 1 | 1 | 0 | 0 | 1 | 0 | 1  | 1    | 0  | 0  | 0  | 1  | –  | 1    | 0  | 2    | 0  |
| <i>Pennisetum basedowii</i>     | 3         | 1 | 0 | 0 | 1 | 1 | 0 | 0 | 0 | 1  | 1    | 0  | 0  | 0  | 1  | –  | 1    | 0  | 2    | 1  |
| <i>Pennisetum chilense</i>      | ?         | 1 | 0 | 1 | 1 | 0 | 0 | 1 | 1 | –  | 1    | 0  | 1  | 0  | –  | –  | 1    | 0  | 2    | 0  |
| <i>Pennisetum clandestinum</i>  | 3         | 0 | 0 | 0 | 1 | 0 | 0 | 1 | 1 | –  | 1    | 0  | 1  | 0  | –  | –  | 0    | 0  | 2    | 0  |
| <i>Pennisetum flaccidum</i>     | 3         | 2 | 1 | 0 | 1 | 1 | 0 | 1 | 0 | 1  | 1    | 0  | 1  | 0  | 0  | –  | 1    | 0  | 2    | 1  |
| <i>Pennisetum foermeranum</i>   | ?         | 1 | 0 | 1 | 1 | 0 | 0 | 1 | 0 | 1  | 0    | 0  | 1  | 0  | 1  | 0  | 1    | 0  | 1    | 1  |
| <i>Pennisetum frutescens</i>    | 3         | 2 | 0 | 0 | 1 | 0 | 0 | 0 | 1 | –  | 1    | 0  | 1  | 0  | –  | –  | 1    | 0  | 2    | 0  |
| <i>Pennisetum glaucocladum</i>  | ?         | 1 | 0 | 1 | 1 | 0 | 0 | 1 | 1 | –  | 1    | 0  | 1  | 0  | –  | –  | 0    | 0  | 2    | 0  |
| <i>Pennisetum glaucum</i>       | 1         | 0 | 0 | 0 | 1 | 0 | 0 | 1 | 0 | 1  | 0    | 0  | 0  | 0  | 1  | 0  | 1    | 0  | 1    | 1  |
| <i>Pennisetum hordeoides</i>    | 3         | 2 | 0 | 0 | 1 | 1 | 0 | 0 | 1 | –  | 1    | 0  | 1  | 1  | –  | –  | 0    | 0  | 2    | 0  |
| <i>Pennisetum lanatum</i>       | 3         | 1 | 0 | 0 | 1 | 0 | 0 | 1 | 0 | 1  | 0    | 0  | 1  | 1  | 0  | 0  | 0    | 0  | 1    | 1  |
| <i>Pennisetum latifolium</i>    | 3         | 2 | 1 | 1 | 1 | 0 | 0 | 1 | 0 | 1  | [01] | 0  | 0  | 0  | 1  | 0  | [01] | 0  | 2    | 1  |

|                                                    |      |   |   |   |   |      |   |   |   |   |   |   |   |   |   |   |   |   |      |   |
|----------------------------------------------------|------|---|---|---|---|------|---|---|---|---|---|---|---|---|---|---|---|---|------|---|
| <i>Pennisetum macrourum</i>                        | 3    | 1 | 0 | 1 | 1 | 0    | 0 | 0 | 1 | – | 1 | 0 | 1 | 0 | – | – | 0 | 0 | 2    | 0 |
| <i>Pennisetum massaicum</i>                        | 2    | 1 | 0 | 1 | 1 | 0    | 0 | 0 | 0 | 0 | 1 | 0 | 1 | 0 | 0 | – | 0 | 0 | 2    | 1 |
| <i>Pennisetum mezianum</i>                         | 2    | 2 | 0 | 0 | 1 | 0    | 0 | 1 | 1 | – | 1 | 0 | 1 | 0 | – | – | 0 | 0 | 2    | 0 |
| <i>Pennisetum montanum</i>                         | 2    | 2 | 0 | 0 | 1 | 1    | 0 | 0 | 0 | 1 | 1 | 0 | 1 | 0 | 0 | – | 0 | 0 | 2    | 0 |
| <i>Pennisetum natalense</i>                        | ?    | 1 | 0 | 1 | 1 | 0    | 0 | 0 | 0 | 1 | 0 | 0 | 0 | 0 | 1 | 0 | 1 | 0 | 2    | 1 |
| <i>Pennisetum nervosum</i>                         | 3    | 0 | 0 | 0 | 1 | 0    | 0 | 1 | 0 | 1 | 1 | 0 | 0 | 0 | 1 | – | 1 | 0 | 2    | 1 |
| <i>Pennisetum orientale</i>                        | 3    | 1 | 0 | 1 | 1 | 0    | 0 | 1 | 0 | 1 | 0 | 0 | 0 | 0 | 1 | 0 | 0 | 0 | 0    | 1 |
| <i>Pennisetum pedicellatum</i>                     | 3    | 1 | 0 | 0 | 1 | 1    | 0 | 0 | 1 | – | 0 | 0 | 1 | 1 | – | 0 | 0 | 0 | 0    | 1 |
| <i>Pennisetum polystachion subsp. atrichum</i>     | 3    | 0 | 0 | 0 | 1 | 0    | 0 | 0 | 1 | – | 1 | 0 | 1 | 1 | – | – | 0 | 0 | 1    | 0 |
| <i>Pennisetum polystachion subsp. polystachyon</i> | 3    | 2 | 0 | 0 | 1 | 0    | 0 | 0 | 1 | – | 1 | 0 | 1 | 1 | – | – | 0 | 0 | 1    | 1 |
| <i>Pennisetum purpureum</i>                        | 1    | 1 | 0 | 1 | 1 | 0    | 0 | 0 | 0 | 1 | 0 | 0 | 0 | 0 | 1 | 0 | 1 | 0 | 1    | 1 |
| <i>Pennisetum ramosum</i>                          | 0    | 1 | ? | 0 | 1 | ?    | 0 | 0 | ? | ? | 1 | 0 | 1 | ? | ? | – | 0 | 0 | 2    | 0 |
| <i>Pennisetum schweinfurthii</i>                   | 1    | 1 | 0 | 0 | 1 | 0    | 0 | 1 | 0 | 1 | 0 | 0 | 1 | 0 | 0 | 0 | 1 | 0 | 1    | 1 |
| <i>Pennisetum setaceum</i>                         | [34] | 1 | 0 | 0 | 1 | [01] | 0 | 1 | 0 | 1 | 0 | 0 | 0 | 0 | 1 | 0 | 1 | 0 | 1    | 1 |
| <i>Pennisetum sieberianum</i>                      | ?    | 1 | 1 | 0 | 1 | 0    | 0 | 1 | 0 | 1 | 0 | 0 | 0 | 0 | 1 | 0 | 1 | 0 | 1    | 1 |
| <i>Pennisetum sphacelatum</i>                      | 3    | 1 | 0 | 1 | 1 | 0    | 0 | 0 | 1 | – | 1 | 0 | 1 | 0 | – | – | 0 | 0 | [12] | 0 |
| <i>Pennisetum squamulatum</i>                      | [13] | 1 | 0 | 1 | 1 | 0    | 0 | 1 | 1 | – | 0 | 0 | 1 | 0 | – | 0 | 1 | 0 | 1    | 1 |
| <i>Pennisetum thunbergii</i>                       | 3    | 1 | 1 | 1 | 1 | 0    | 0 | 1 | 1 | – | 1 | 0 | 1 | 0 | – | – | 0 | 0 | 2    | 0 |
| <i>Pennisetum trachyphyllum</i>                    | ?    | 0 | 0 | 0 | 1 | 1    | 0 | 1 | 0 | 1 | 0 | 0 | 0 | 0 | 1 | 0 | 0 | 0 | 2    | 1 |
| <i>Pennisetum tristachyum</i>                      | ?    | 2 | 1 | 0 | 1 | 1    | 0 | 0 | 0 | 1 | 1 | 0 | 0 | 0 | 1 | – | 1 | 0 | 2    | 0 |
| <i>Pennisetum unisetum</i>                         | 3    | 1 | 0 | 0 | 1 | 1    | 0 | 1 | 1 | – | 1 | 0 | 1 | 0 | – | – | 0 | 0 | 2    | 0 |
| <i>Pennisetum villosum</i>                         | 3    | 2 | 0 | 1 | 1 | 0    | 0 | 1 | 0 | 1 | 0 | 0 | 0 | 0 | 1 | 0 | 0 | 0 | 0    | 1 |
| <i>Pennisetum violaceum</i>                        | 1    | 1 | ? | ? | 1 | ?    | 0 | 1 | ? | ? | 1 | 0 | ? | ? | ? | – | 1 | 0 | 1    | 1 |

| Taxon                           | Character |    |      |    |      |      |      |    |    |      |      |      |      |      |      |      |      |      |      |      |
|---------------------------------|-----------|----|------|----|------|------|------|----|----|------|------|------|------|------|------|------|------|------|------|------|
|                                 | 21        | 22 | 23   | 24 | 25   | 26   | 27   | 28 | 29 | 30   | 31   | 32   | 33   | 34   | 35   | 36   | 37   | 38   | 39   | 40   |
| <i>Rupichloa acuminata</i>      | –         | –  | –    | 0  | 1    | 2    | 2    | 1  | 0  | 2    | 4    | 1    | 0    | 3    | 1    | 0    | 1    | 2    | 0    | 1    |
| <i>Ixophorus unisetus</i>       | 0         | 3  | –    | 0  | 1    | 2    | 1    | 0  | 0  | 2    | 4    | 1    | 0    | 3    | 1    | 0    | 1    | 2    | 0    | 1    |
| <i>Paspalidium geminatum</i>    | 0         | 2  | –    | 0  | 1    | 2    | 2    | 1  | 2  | 2    | 3    | 2    | 0    | 3    | 2    | 0    | 1    | 2    | 0    | 1    |
| <i>Setaria palmifolia</i>       | 0         | 3  | –    | 0  | 0    | 2    | 1    | 0  | 0  | 2    | 1    | 0    | 0    | 3    | 1    | 0    | 1    | [12] | 0    | 1    |
| <i>Setaria parviflora</i>       | 0         | 3  | –    | 0  | 0    | 2    | [12] | 0  | 0  | 2    | [23] | 0    | 0    | 3    | 0    | 0    | 1    | 2    | 0    | 1    |
| <i>Setaria sphacelata</i>       | 0         | 3  | –    | 0  | 1    | 2    | 2    | 0  | 2  | 2    | 3    | 0    | 2    | 3    | 1    | 0    | 1    | 2    | 0    | 1    |
| <i>Stenotaphrum secundatum</i>  | 0         | 2  | –    | 0  | 1    | [12] | 1    | 0  | 2  | 2    | 4    | 1    | 0    | 3    | 2    | 0    | 1    | 2    | 0    | 1    |
| <i>Odontelytrum abyssinicum</i> | 3         | 1  | 0    | 0  | 1    | 0    | –    | –  | –  | [12] | [12] | 1    | 0    | 3    | 1    | 0    | 1    | 1    | 1    | 1    |
| <i>Cenchrus brownii</i>         | 2         | 2  | 1    | 0  | 1    | [01] | 0    | –  | 2  | 2    | 3    | 1    | 0    | 3    | 1    | 0    | 1    | 2    | 1    | 1    |
| <i>Cenchrus ciliaris</i>        | 1         | 1  | [01] | 0  | [01] | 2    | 2    | 0  | 0  | 2    | 2    | 0    | 0    | 3    | [01] | 0    | 1    | [01] | 0    | 1    |
| <i>Cenchrus echinatus</i>       | 2         | 2  | 1    | 0  | 1    | 2    | [12] | 1  | 0  | 2    | 4    | 1    | 0    | 3    | 1    | 0    | 1    | 2    | 1    | 1    |
| <i>Cenchrus incertus</i>        | 3         | 2  | 1    | 0  | 1    | 2    | 2    | 0  | 1  | 2    | 3    | 1    | 0    | 3    | 1    | 0    | 1    | 2    | 1    | 1    |
| <i>Cenchrus myosuroides</i>     | 1         | 2  | 0    | 0  | [01] | 2    | [12] | 0  | 0  | 2    | 3    | 1    | 0    | 3    | 1    | 0    | 1    | 1    | 0    | 1    |
| <i>Cenchrus pilosus</i>         | 2         | 1  | 1    | 0  | 0    | 2    | 2    | 0  | 0  | 2    | 3    | 1    | 0    | 3    | 1    | 1    | 1    | 2    | 1    | 1    |
| <i>Cenchrus setigerus</i>       | 2         | 2  | 1    | 0  | 1    | 2    | 2    | 0  | 0  | 2    | 2    | 0    | 0    | 3    | 1    | 0    | 1    | 1    | [14] | 1    |
| <i>Pennisetum alopecuroides</i> | 0         | 1  | 0    | 0  | 0    | 1    | 0    | –  | –  | 2    | 2    | 1    | 0    | 3    | 1    | 0    | 1    | 1    | 0    | 1    |
| <i>Pennisetum basedowii</i>     | 0         | 1  | 0    | 0  | 0    | 0    | –    | –  | –  | 2    | 4    | 1    | 1    | 3    | 2    | 1    | 1    | 1    | 1    | 1    |
| <i>Pennisetum chilense</i>      | 0         | 3  | 0    | 0  | 1    | 1    | 0    | –  | 2  | 2    | 1    | [01] | 0    | 3    | 1    | [01] | [01] | 1    | 1    | [01] |
| <i>Pennisetum clandestinum</i>  | 0         | 2  | 0    | 0  | 0    | [01] | 0    | –  | 2  | [01] | 0    | –    | –    | 3    | 1    | 0    | 1    | 1    | 0    | 1    |
| <i>Pennisetum flaccidum</i>     | 0         | 0  | 0    | 0  | 1    | 2    | 1    | 0  | 0  | 2    | 2    | 0    | 0    | 3    | 2    | 1    | 1    | 1    | 1    | 1    |
| <i>Pennisetum foermeranum</i>   | 0         | 0  | 1    | 1  | 1    | 2    | [12] | 0  | 0  | 2    | 3    | 1    | 1    | 3    | 1    | 1    | 1    | 1    | 1    | 1    |
| <i>Pennisetum frutescens</i>    | 0         | 0  | 0    | 0  | 1    | 2    | 1    | 1  | 0  | 2    | 3    | 1    | 1    | 3    | 1    | 1    | 1    | 1    | 1    | 1    |
| <i>Pennisetum glaucocladum</i>  | 0         | 0  | 0    | 0  | 0    | [01] | 0    | –  | –  | 2    | 1    | 0    | 1    | 3    | 1    | 1    | 1    | 0    | 0    | 1    |
| <i>Pennisetum glaucum</i>       | 0         | 2  | [01] | 0  | [01] | [01] | 0    | –  | 2  | [01] | 0    | –    | –    | [01] | [01] | 2    | 0    | 1    | 2    | 0    |
| <i>Pennisetum hordeoides</i>    | 0         | 0  | 0    | 0  | 1    | [01] | 0    | –  | 2  | 2    | 4    | 1    | 3    | 3    | 1    | 4    | 0    | 2    | 2    | 0    |
| <i>Pennisetum lanatum</i>       | 0         | 2  | 0    | 0  | 1    | 2    | 2    | 0  | 2  | 2    | 2    | 0    | [02] | 3    | 1    | 1    | 1    | 0    | 1    | 1    |
| <i>Pennisetum latifolium</i>    | 0         | 0  | 0    | 0  | 0    | 1    | 0    | –  | 2  | 2    | [12] | 1    | [03] | 3    | 2    | [01] | 1    | 2    | [01] | 1    |
| <i>Pennisetum macrourum</i>     | 0         | 0  | 0    | 0  | [01] | 1    | 0    | –  | 2  | 2    | 2    | 1    | 0    | 3    | 1    | 0    | 1    | 1    | 1    | 1    |
| <i>Pennisetum massaicum</i>     | 0         | 1  | 0    | 0  | [01] | 2    | 2    | 1  | 0  | 2    | 3    | 1    | 1    | 3    | 1    | 1    | 1    | 2    | 1    | 1    |
| <i>Pennisetum mezianum</i>      | 0         | 2  | 0    | 0  | 1    | 2    | 2    | 0  | 0  | 2    | 4    | 1    | 1    | 3    | 1    | 1    | 1    | 0    | 1    | 1    |

|                                                    |   |      |      |   |      |      |      |   |      |   |      |   |      |       |      |      |   |   |      |   |
|----------------------------------------------------|---|------|------|---|------|------|------|---|------|---|------|---|------|-------|------|------|---|---|------|---|
| <i>Pennisetum montanum</i>                         | 0 | 2    | 0    | 0 | [01] | 2    | 0    | 0 | [02] | 2 | [23] | 0 | [13] | 3     | 2    | [14] | 1 | 2 | [14] | 1 |
| <i>Pennisetum natalense</i>                        | 0 | 0    | 0    | 0 | [01] | [01] | 0    | – | 2    | 2 | 1    | 0 | 1    | 3     | 1    | 1    | 1 | 0 | 1    | 1 |
| <i>Pennisetum nervosum</i>                         | 0 | 1    | 0    | 0 | 0    | 2    | 2    | 0 | 0    | 2 | 4    | 1 | 1    | 3     | 1    | 1    | 1 | 1 | 1    | 1 |
| <i>Pennisetum orientale</i>                        | 0 | 1    | 0    | 0 | 1    | 2    | [12] | 0 | 0    | 2 | 3    | 1 | 1    | 3     | 1    | 1    | 1 | 1 | 1    | 1 |
| <i>Pennisetum pedicellatum</i>                     | 0 | 1    | 1    | 0 | [01] | 2    | [12] | 1 | [02] | 0 | 3    | 2 | 1    | 3     | 1    | 4    | 1 | 2 | 0    | 0 |
| <i>Pennisetum polystachion subsp. atrichum</i>     | 0 | 0    | 0    | 0 | 1    | 0    | –    | – | –    | 2 | 4    | 1 | 1    | 3     | 1    | 4    | 0 | 2 | 0    | 0 |
| <i>Pennisetum polystachion subsp. polystachyon</i> | 0 | 0    | 0    | 0 | [01] | [01] | 0    | – | 2    | 2 | 4    | 1 | 0    | 3     | 1    | 4    | 0 | 2 | 0    | 0 |
| <i>Pennisetum purpureum</i>                        | 0 | 0    | [01] | 1 | 1    | 1    | 0    | – | 2    | 2 | 2    | 0 | 0    | 3     | [01] | 0    | 1 | 2 | 1    | 1 |
| <i>Pennisetum ramosum</i>                          | 0 | 0    | 0    | 0 | [01] | 2    | 1    | 0 | 2    | 2 | [34] | 1 | 0    | [23]  | 1    | 0    | ? | 1 | 0    | ? |
| <i>Pennisetum schweinfurthii</i>                   | 0 | 1    | 1    | 1 | 0    | 0    | –    | – | –    | 2 | 1    | 1 | 2    | 0     | 1    | [02] | 1 | 2 | 1    | 1 |
| <i>Pennisetum setaceum</i>                         | 0 | 1    | [01] | 1 | [01] | 0    | –    | – | –    | 2 | [12] | 0 | 0    | 3     | 1    | 1    | 1 | 1 | 1    | 1 |
| <i>Pennisetum sieberianum</i>                      | 0 | [02] | [01] | 0 | [01] | 1    | –    | – | 2    | 1 | 0    | – | –    | 3     | 1    | 2    | 0 | 2 | 4    | 0 |
| <i>Pennisetum sphacelatum</i>                      | 0 | 2    | 0    | 0 | 0    | 1    | 0    | – | 2    | 2 | 1    | 1 | 0    | 3     | 1    | 1    | 1 | 2 | 1    | 1 |
| <i>Pennisetum squamulatum</i>                      | 0 | 2    | 1    | 1 | 0    | 0    | –    | – | –    | 1 | 0    | – | –    | 1     | 0    | 0    | 0 | 1 | 0    | 0 |
| <i>Pennisetum thunbergii</i>                       | 0 | 1    | 0    | 0 | 0    | 0    | –    | – | –    | 2 | 1    | 0 | 0    | 2     | 1    | 1    | 2 | 1 | 0    | 1 |
| <i>Pennisetum trachyphyllum</i>                    | 0 | 0    | 0    | 0 | [01] | 2    | 1    | 0 | 1    | 2 | 3    | 0 | 1    | 3     | 1    | 1    | 1 | 2 | 1    | 1 |
| <i>Pennisetum tristachyum</i>                      | 0 | 3    | 0    | 0 | 0    | 0    | –    | – | –    | 2 | 1    | 0 | 0    | 3     | 1    | 1    | 1 | 1 | 1    | 1 |
| <i>Pennisetum unisetum</i>                         | 0 | 3    | 0    | 0 | 0    | 1    | 0    | – | 2    | 1 | 0    | – | –    | 1     | 2    | 0    | 0 | 1 | 2    | 1 |
| <i>Pennisetum villosum</i>                         | 0 | 3    | [01] | 0 | [01] | [01] | 0    | – | 2    | 2 | 1    | 0 | 0    | 3     | 1    | 1    | 1 | 1 | 1    | 1 |
| <i>Pennisetum violaceum</i>                        | 0 | 2    | [12] | 0 | [01] | [01] | 0    | – | 2    | 2 | 2    | 0 | 2    | [012] | 2    | 2    | 0 | 2 | [02] | 0 |

| Taxon                           | Character |      |    |    |    |    |    |    |    |    |    |
|---------------------------------|-----------|------|----|----|----|----|----|----|----|----|----|
|                                 | 41        | 42   | 43 | 44 | 45 | 46 | 47 | 48 | 49 | 50 | 51 |
| <i>Rupichloa acuminata</i>      | 2         | 0    | 1  | 0  | 1  | 1  | 1  | 1  | 0  | 1  | 0  |
| <i>Ixophorus unisetus</i>       | 2         | 0    | 1  | 2  | 1  | 1  | 1  | 1  | 0  | 0  | 1  |
| <i>Paspalidium geminatum</i>    | 2         | 2    | 1  | 0  | 1  | 1  | 1  | 1  | 0  | 0  | 0  |
| <i>Setaria palmifolia</i>       | 1         | –    | –  | 0  | 1  | 1  | 1  | 1  | 0  | 1  | 0  |
| <i>Setaria parviflora</i>       | 2         | 0    | 1  | 0  | 1  | 1  | 1  | 1  | 0  | 1  | 0  |
| <i>Setaria sphacelata</i>       | 2         | 0    | 1  | 0  | 1  | 1  | 1  | 1  | 0  | 0  | 0  |
| <i>Stenotaphrum secundatum</i>  | 2         | 0    | 1  | 0  | 1  | 1  | 1  | 1  | 0  | 0  | 1  |
| <i>Odontelytrum abyssinicum</i> | 2         | [13] | 1  | 4  | 1  | 0  | 1  | 0  | 0  | 0  | 1  |
| <i>Cenchrus brownii</i>         | 2         | 1    | 1  | 1  | 1  | 0  | 0  | 1  | 0  | 0  | 1  |
| <i>Cenchrus ciliaris</i>        | [02]      | 0    | 0  | 0  | 1  | 0  | 0  | 1  | 0  | 0  | 1  |
| <i>Cenchrus echinatus</i>       | 2         | 0    | 1  | 1  | 1  | 0  | 0  | 1  | 0  | 0  | 1  |
| <i>Cenchrus incertus</i>        | 2         | 0    | 1  | 1  | 1  | 0  | 0  | 1  | 0  | 0  | 1  |
| <i>Cenchrus myosuroides</i>     | [02]      | 3    | 1  | 0  | 1  | 0  | 0  | 2  | 0  | 0  | 1  |
| <i>Cenchrus pilosus</i>         | [12]      | 0    | 1  | 1  | 1  | 0  | 0  | 1  | 0  | 0  | 1  |
| <i>Cenchrus setigerus</i>       | 2         | 3    | 1  | 4  | 1  | 0  | 0  | 1  | 0  | 0  | 1  |
| <i>Pennisetum alopecuroides</i> | 0         | –    | –  | 0  | 1  | 0  | 1  | 1  | 0  | 0  | 1  |
| <i>Pennisetum basedowii</i>     | 0         | –    | –  | 1  | 1  | 0  | 0  | 1  | 0  | 0  | 1  |
| <i>Pennisetum chilense</i>      | 2         | 3    | 1  | 0  | 0  | 0  | 1  | 0  | 0  | 0  | 1  |
| <i>Pennisetum clandestinum</i>  | 0         | –    | –  | 1  | 0  | 0  | 1  | –  | 0  | 0  | 1  |
| <i>Pennisetum flaccidum</i>     | 2         | ?    | 1  | 0  | 1  | 0  | 1  | 1  | 0  | 0  | 1  |
| <i>Pennisetum foermeranum</i>   | 2         | 3    | 1  | 3  | 1  | 0  | 0  | 1  | 0  | 0  | 1  |
| <i>Pennisetum frutescens</i>    | [01]      | –    | –  | 1  | 1  | 0  | 0  | 1  | 0  | 0  | 1  |
| <i>Pennisetum glaucocladum</i>  | 0         | –    | –  | 1  | 1  | 0  | 1  | 0  | 0  | 0  | 1  |
| <i>Pennisetum glaucum</i>       | [02]      | 4    | 0  | 4  | 0  | 0  | 0  | 1  | 1  | 0  | 1  |
| <i>Pennisetum hordeoides</i>    | 2         | 2    | 0  | 2  | 0  | 0  | 0  | 1  | 0  | 0  | 1  |
| <i>Pennisetum lanatum</i>       | 2         | 4    | 1  | 1  | 1  | 0  | 1  | 1  | 0  | 0  | 1  |
| <i>Pennisetum latifolium</i>    | 0         | –    | –  | 0  | 1  | 0  | 1  | 1  | 0  | 0  | 1  |
| <i>Pennisetum macrourum</i>     | [02]      | 0    | 1  | 1  | 1  | 0  | 1  | 1  | 0  | 0  | 1  |
| <i>Pennisetum massaicum</i>     | [12]      | 2    | 1  | 1  | 1  | 0  | 0  | 1  | 0  | 0  | 1  |
| <i>Pennisetum megianum</i>      | 2         | 0    | 1  | 0  | 1  | 0  | 0  | 1  | 0  | 0  | 1  |
| <i>Pennisetum montanum</i>      | [02]      | 1    | 1  | 1  | 1  | 0  | 1  | 1  | 0  | 0  | 1  |

|                                                    |      |   |   |      |   |   |      |   |      |   |   |
|----------------------------------------------------|------|---|---|------|---|---|------|---|------|---|---|
| <i>Pennisetum natalense</i>                        | [01] | 0 | 1 | [02] | 1 | 0 | 1    | 0 | 0    | 0 | 1 |
| <i>Pennisetum nervosum</i>                         | [01] | – | – | 1    | 1 | 0 | 1    | 1 | 0    | 0 | 1 |
| <i>Pennisetum orientale</i>                        | 2    | 0 | 1 | 1    | 1 | 0 | 1    | 1 | 0    | 0 | 1 |
| <i>Pennisetum pedicellatum</i>                     | [02] | 4 | 1 | 0    | 0 | 0 | 0    | 1 | 0    | 0 | 1 |
| <i>Pennisetum polystachion subsp. atrichum</i>     | 2    | 0 | 0 | 0    | 0 | 0 | 0    | ? | 0    | 0 | 1 |
| <i>Pennisetum polystachion subsp. polystachyon</i> | [02] | 0 | 0 | 0    | 0 | 0 | 0    | 1 | 0    | 0 | 1 |
| <i>Pennisetum purpureum</i>                        | 2    | 0 | 1 | 1    | 1 | 0 | [01] | 0 | 1    | 0 | 1 |
| <i>Pennisetum ramosum</i>                          | 2    | ? | ? | ?    | ? | ? | 0    | 1 | 0    | 0 | ? |
| <i>Pennisetum schweinfurthii</i>                   | 0    | – | – | 1    | 1 | 0 | 1    | 0 | 0    | 0 | 1 |
| <i>Pennisetum setaceum</i>                         | [02] | 0 | 1 | 1    | 1 | 0 | 0    | 0 | 0    | 0 | 1 |
| <i>Pennisetum sieberianum</i>                      | 2    | 4 | 0 | 4    | 0 | 0 | 0    | 0 | 1    | 0 | 1 |
| <i>Pennisetum sphacelatum</i>                      | 0    | – | – | 1    | 1 | 0 | 1    | 1 | 0    | 0 | 1 |
| <i>Pennisetum squamulatum</i>                      | 0    | – | – | 0    | 0 | 0 | 0    | 0 | 0    | 0 | 1 |
| <i>Pennisetum thunbergii</i>                       | 0    | – | – | 0    | 1 | 0 | 1    | 1 | [01] | 0 | 1 |
| <i>Pennisetum trachyphyllum</i>                    | 2    | 0 | 0 | 0    | 0 | 0 | 1    | 1 | 0    | 0 | 1 |
| <i>Pennisetum tristachyum</i>                      | 0    | – | – | 0    | 1 | 0 | 1    | 1 | 0    | 0 | 1 |
| <i>Pennisetum unisetum</i>                         | 0    | – | – | 4    | 1 | 0 | 1    | 1 | 0    | 0 | 1 |
| <i>Pennisetum villosum</i>                         | [02] | 3 | 1 | 1    | 1 | 0 | 0    | – | 0    | 0 | 1 |
| <i>Pennisetum violaceum</i>                        | [12] | ? | ? | ?    | ? | 0 | 0    | 0 | 1    | 0 | 1 |

---
